# Supplementary material for: Bayesian adaptive clinical trials of combination treatments
Source: PubMed Central journal article supplement (PMC5898557; doi:10.1016/j.conctc.2017.11.001), 2017-11-03
Supplement: mmc1.pdf [file mmc1.pdf]

**Figure S.1:** Power of detecting superiority of A&B (i.e.,  $\Pr(P_{A\&B\ best} > 0.95)$ ) for fixed sample size design.

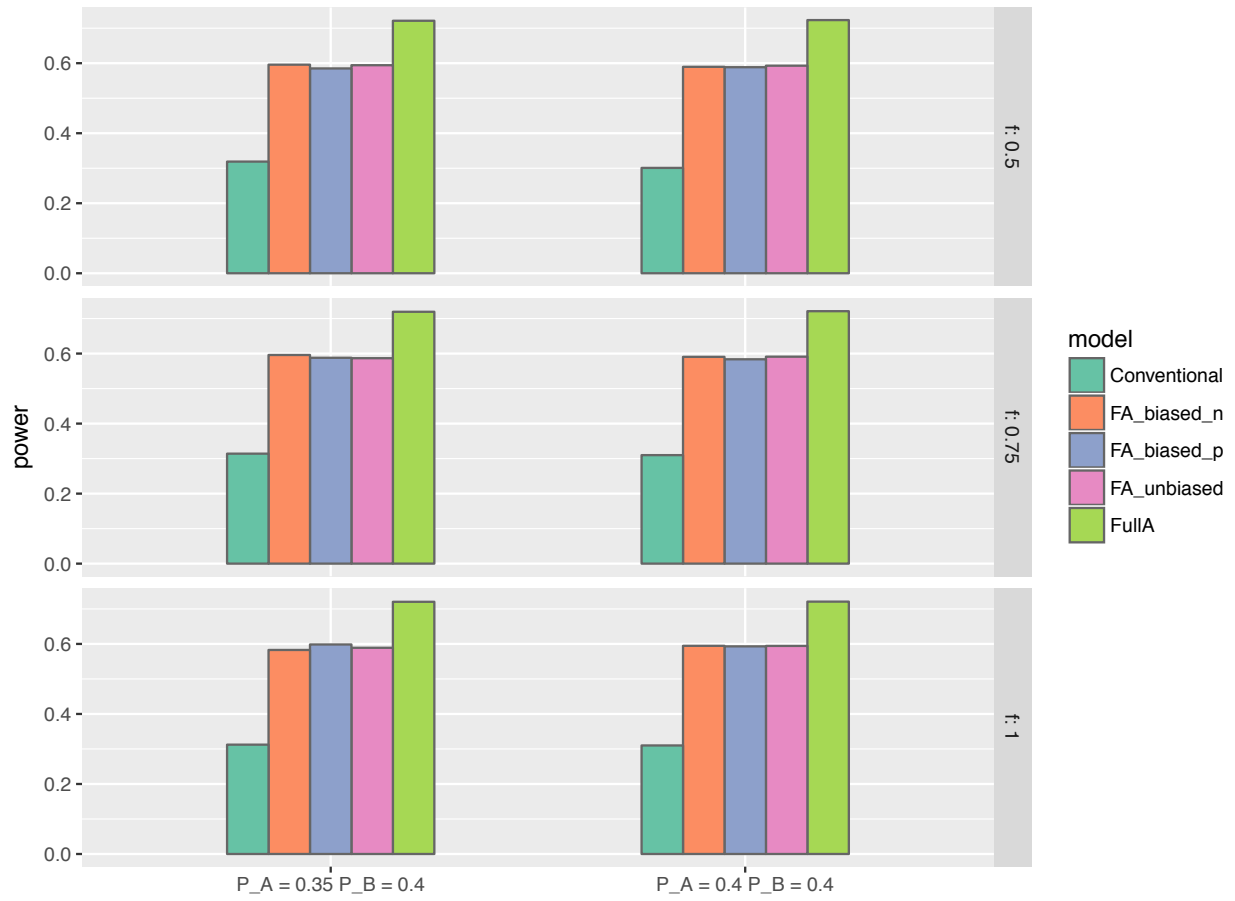

FA (fractional additivity); P\_A (probability of response with A); P\_B (probability of response with B).

**Figure S.2:** Probability of A&B being superior (y-axis) in relation to the number of interim looks (x-axis) in the non-adaptive trial simulation. The sample size between interim looks is fixed and allocation ratio is 1:1:1.

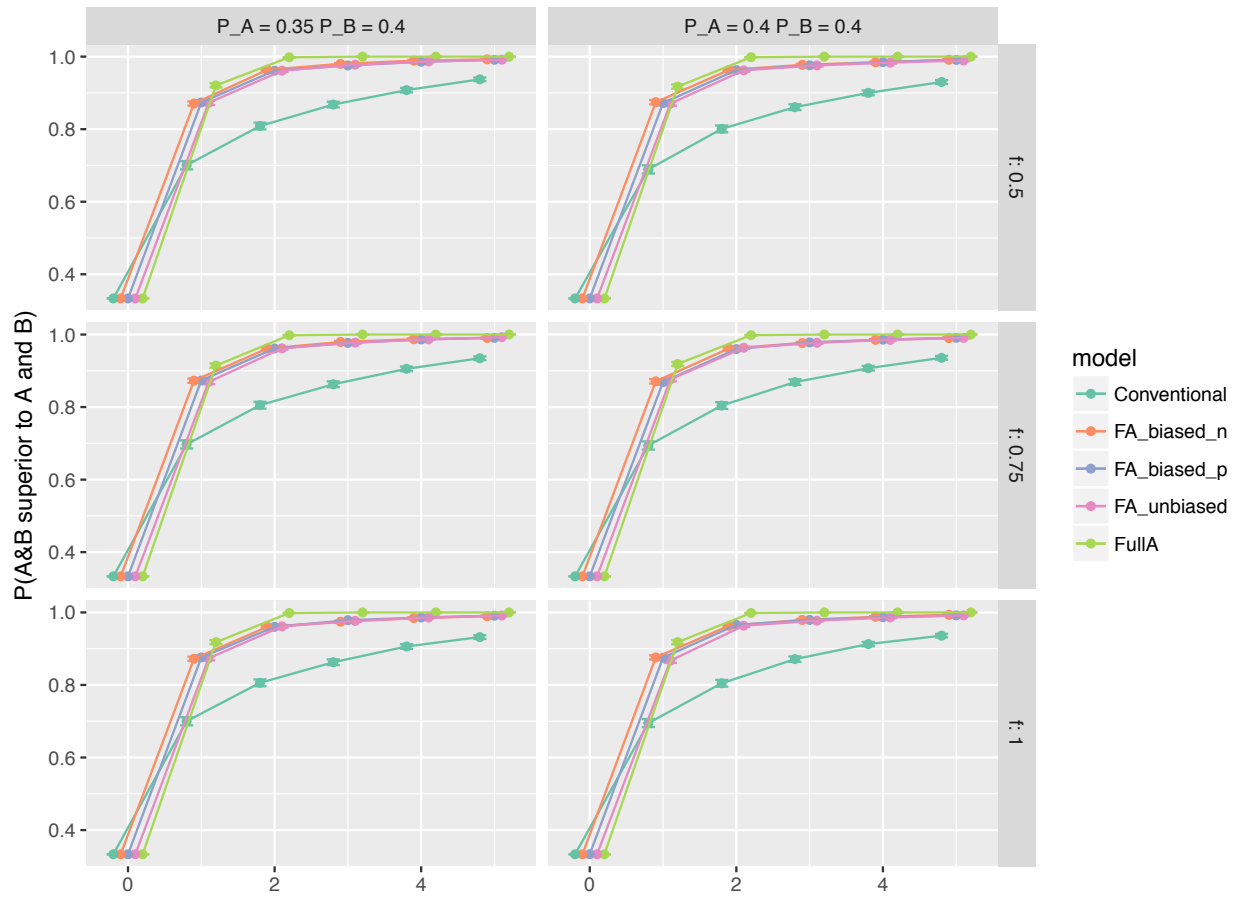

FA (fractional additivity);  $P_A$  (probability of response with A);  $P_B$  (probability of response with B).

**Figure S.3:** Probability of A being superior (y-axis) in relation to the number of interim looks (x-axis) in the non-adaptive trial simulation. The sample size between interim looks is fixed and allocation ratio is 1:1:1.

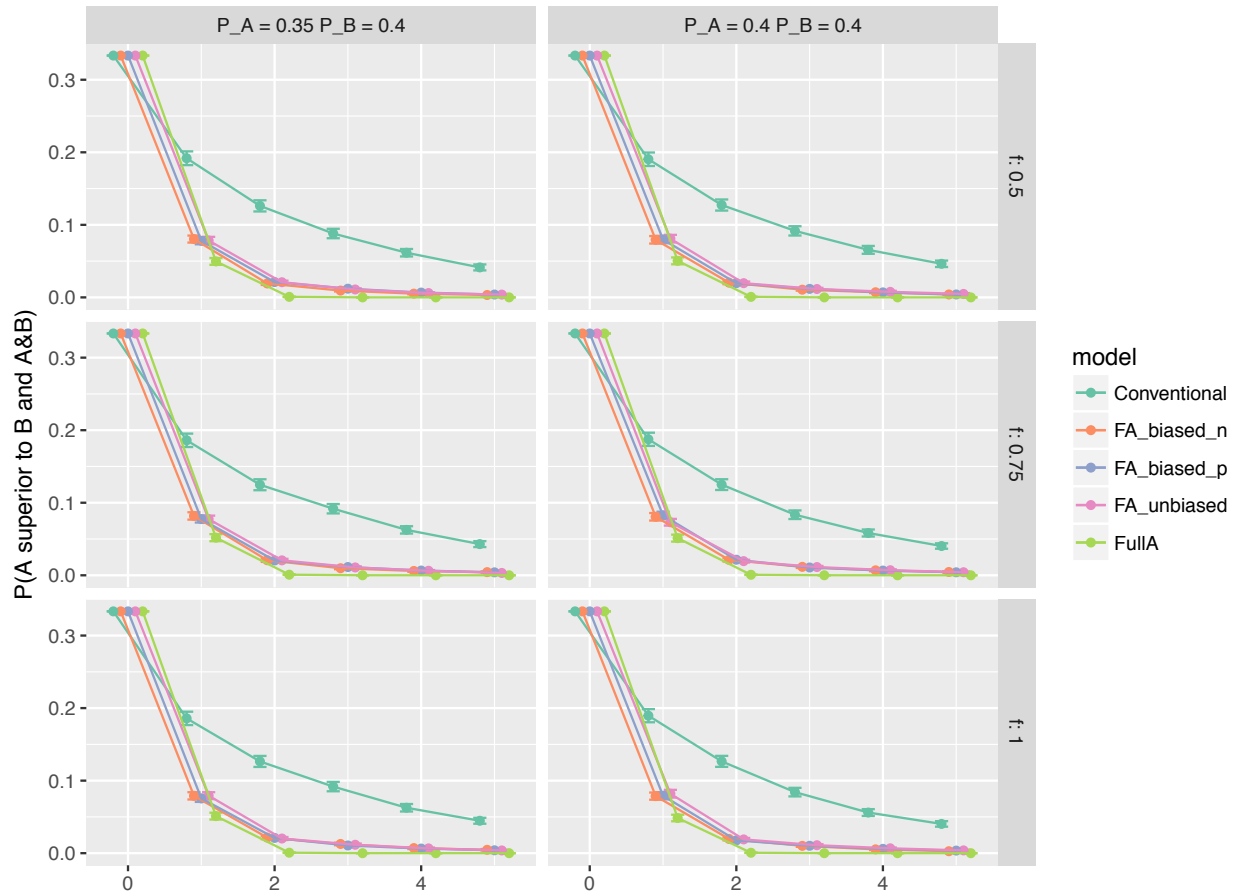

FA (fractional additivity);  $P_A$  (probability of response with A);  $P_B$  (probability of response with B).

**Figure S.4:** Probability of B being superior (y-axis) in relation to the number of interim looks (x-axis) in the non-adaptive trial simulation. The sample size between interim looks is fixed and allocation ratio is 1:1:1.

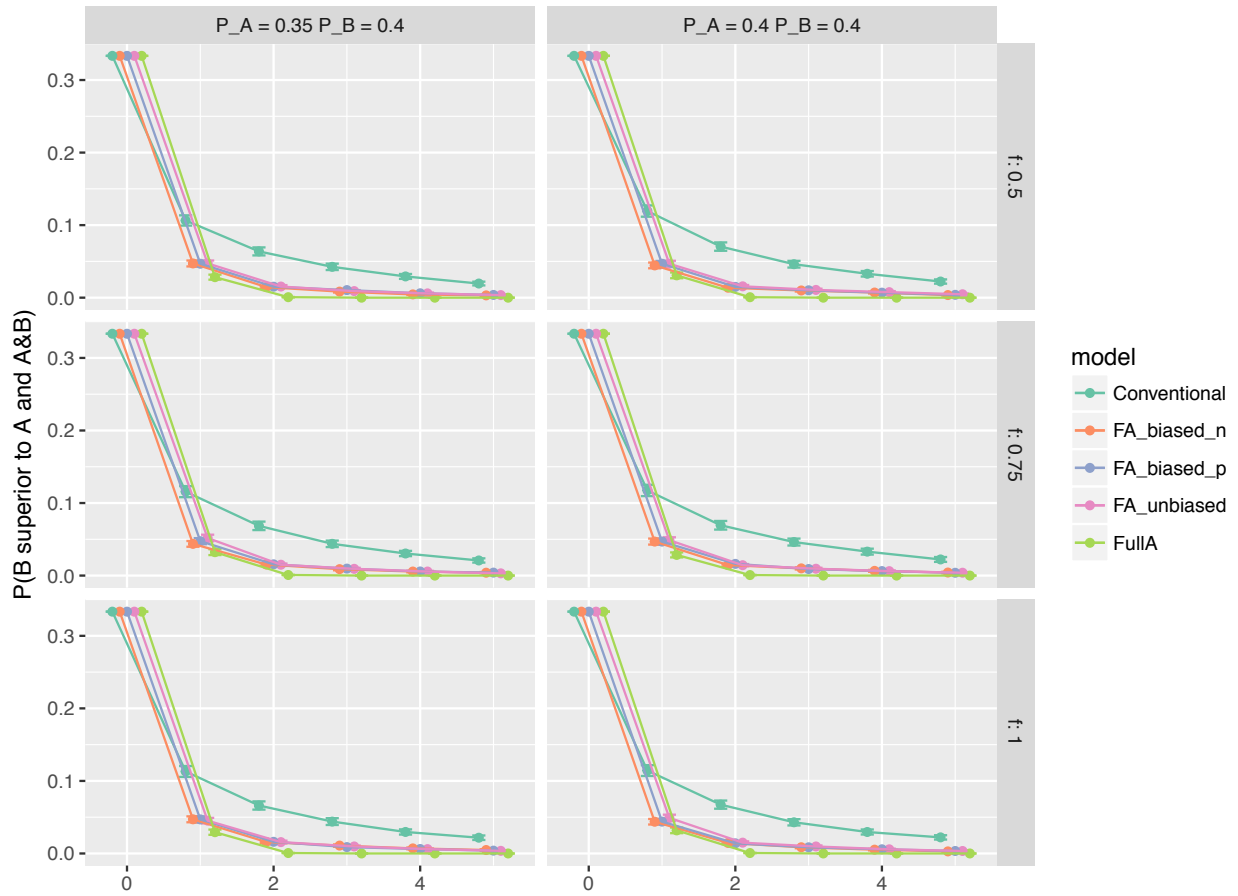

FA (fractional additivity);  $P_A$  (probability of response with A);  $P_B$  (probability of response with B).

**Figure S.5:** Evolution of probability of superiority (for all three arms) and posterior density estimates (for individual therapies A and B) for two example trials: an example where the data shows the expected fractional additive effect early (first row); one example in which fractional additivity is less pronounced due to random error and a larger number of batches is required to identify the superior therapy (second row).

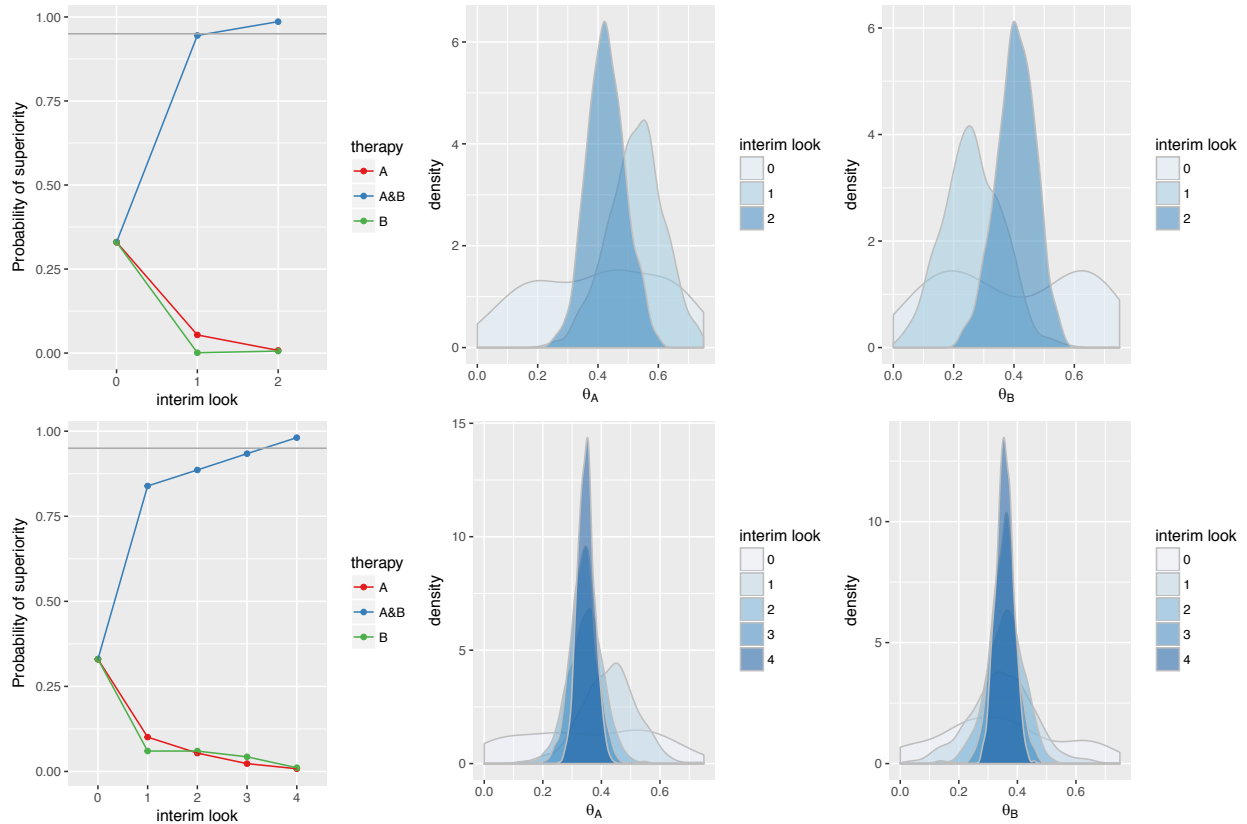

**Figure S.6:** Expected sample size in 4 simulation scenarios representing no or weak fractional additivity with biased priors on  $f$  with prior means 0.5 and 0.75, the conventional model (i.e, where  $\theta_{A\&B}$  is treated as completely independent of  $\theta_A$  and  $\theta_B$  and all priors are non-informative) and a model with full additivity assumption ( $f = 1$ ). The upper, middle and lower plots present the scenarios where the *true* fractional additivity parameter value ( $f$ ) is set to 0, 0.25, and 1, respectively. The left plots present the scenario where the failure probabilities of treatments A and B are set to  $P_A=0.35$  and  $P_B=0.40$ , whereas the plots to the right present the scenarios where  $P_A=0.40$  and  $P_B=0.40$ . Note that the results for the conventional model and the full additivity model are averaged over a set of simulations with sample sizes specified by  $f$  equal to either of prior means 0.5 and 0.75.

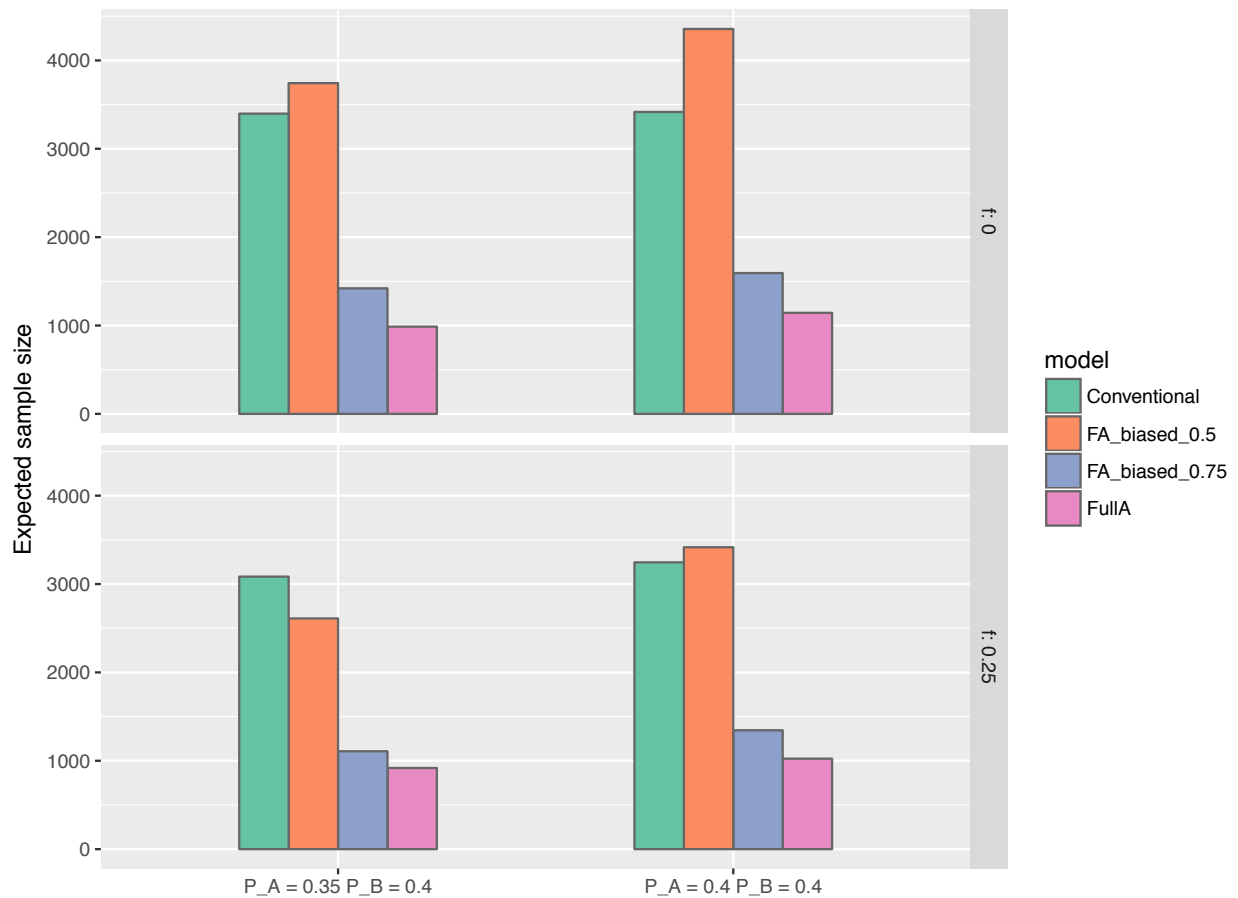

RMSE (root mean square error); FA (fractional additivity);  $P_A$  (probability of response with A);  $P_B$  (probability of response with B).

**Figure S.7:** Empirical cumulative distribution function for the probability of trial termination (y-axis) by cumulative Information Fraction (IF) of the required sample size. Note, each interim look accounts for 20% information fraction (e.g., the information fraction of 60% corresponds to the third interim look).

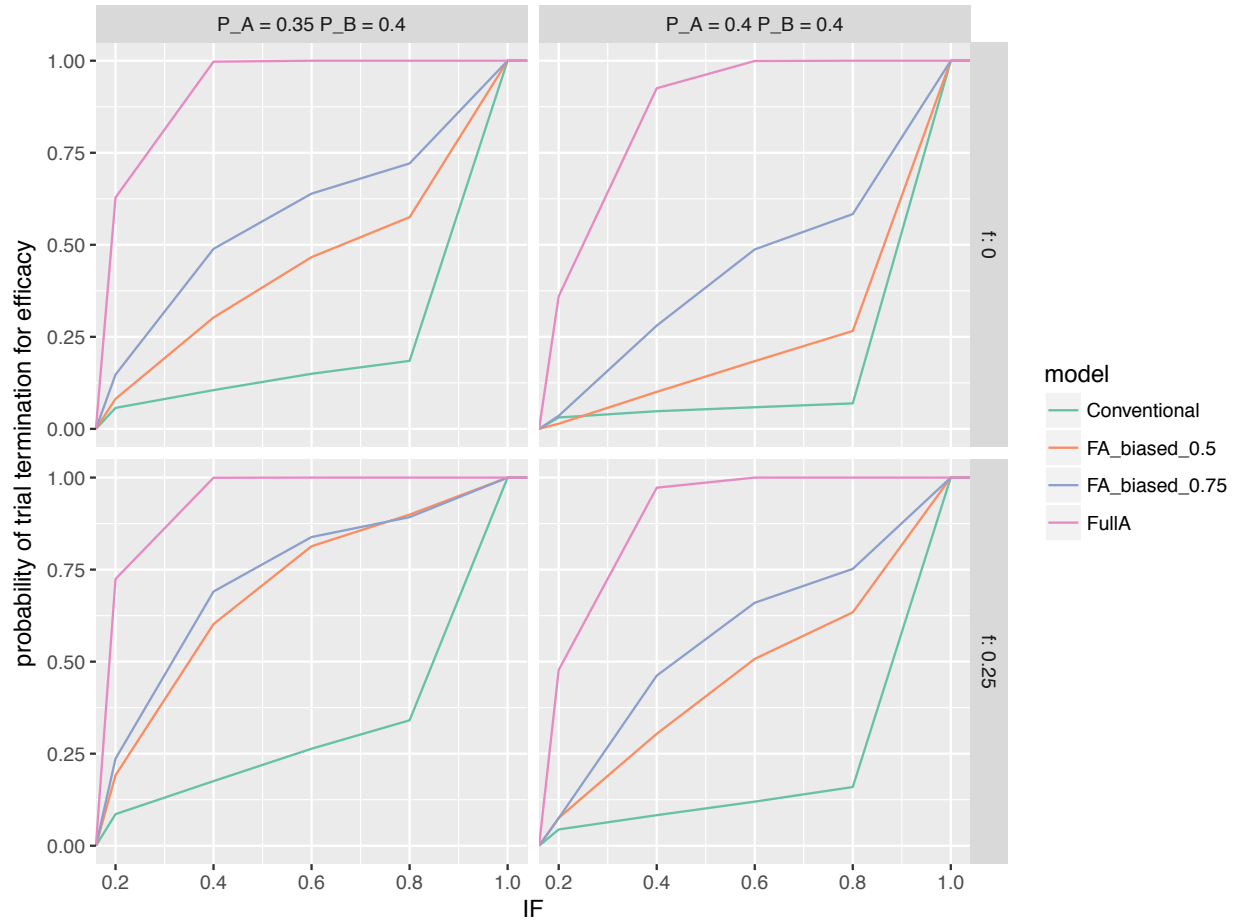

IF (information fraction); FA (fractional additivity); P\_A (probability of response with A); P\_B (probability of response with B).

**Figure S.8:** Root mean square error for the effect size of A&B calculated for the six different simulation scenarios for the proposed model with a biased and unbiased prior, the conventional model (i.e., where  $\theta_{A\&B}$  is treated as completely independent of  $\theta_A$  and  $\theta_B$  and all priors are non-informative) and a model that assumes full additivity ( $f = 1$ ). The upper, middle and lower plots present the scenarios where the *true* fractional additivity parameter value ( $f$ ) is set to 0.5, 0.75, and 1, respectively. The left plots present the scenario where the failure probabilities of treatments A and B are set to  $P_A=0.35$  and  $P_B=0.40$ , whereas the plots to the right present the scenarios where  $P_A=0.40$  and  $P_B=0.40$ .

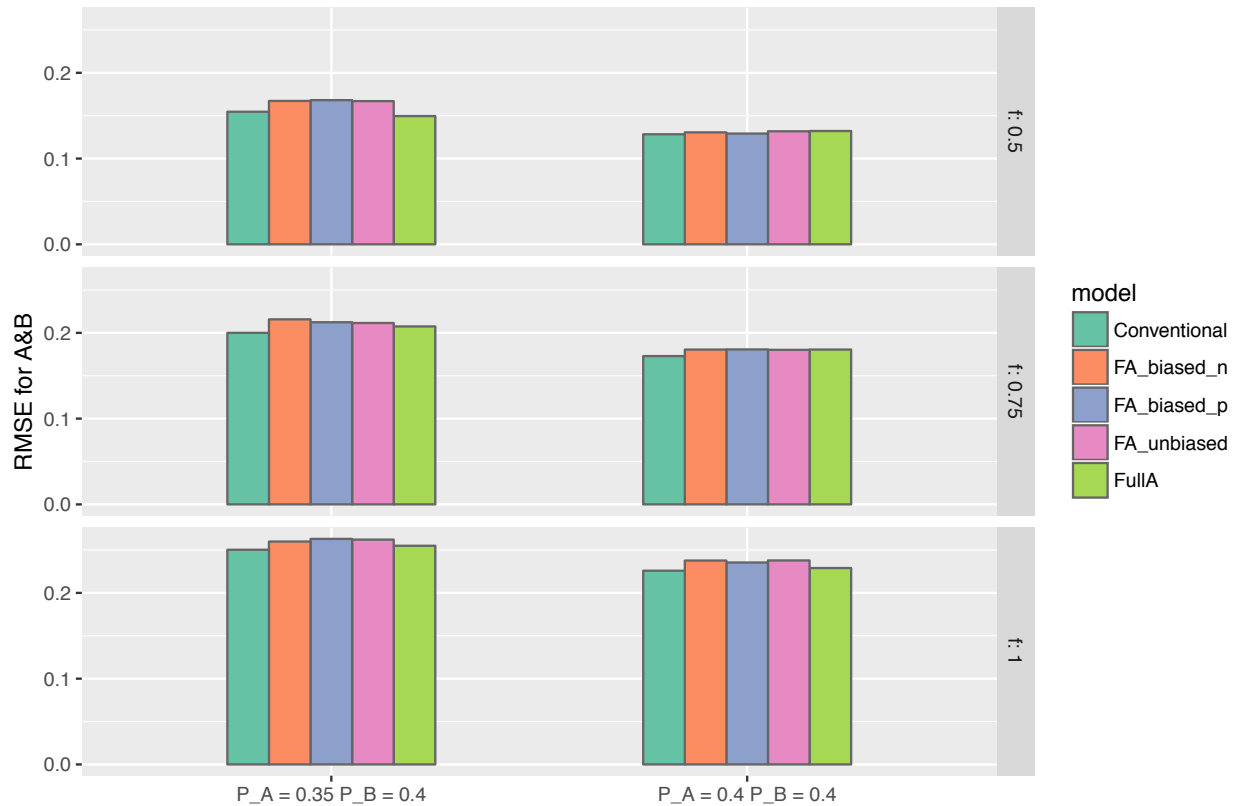

RMSE (root mean square error); FA (fractional additivity);  $P_A$  (probability of response with A);  $P_B$  (probability of response with B).



**Figure S.9:** Root mean square error for the effect size of A calculated for the six different simulation scenarios for the proposed model with a biased and unbiased prior, the conventional model (i.e., where  $\theta_{A\&B}$  is treated as completely independent of  $\theta_B$  and  $\theta_A$  and all priors are non-informative) and a model that assumes full additivity ( $f = 1$ ). The upper, middle and lower plots present the scenarios where the *true* fractional additivity parameter value ( $f$ ) is set to 0.5, 0.75, and 1, respectively. The left plots present the scenario where the failure probabilities of treatments A and B are set to  $P_A=0.35$  and  $P_B=0.40$ , whereas the plots to the right present the scenarios where  $P_A=0.40$  and  $P_B=0.40$ .

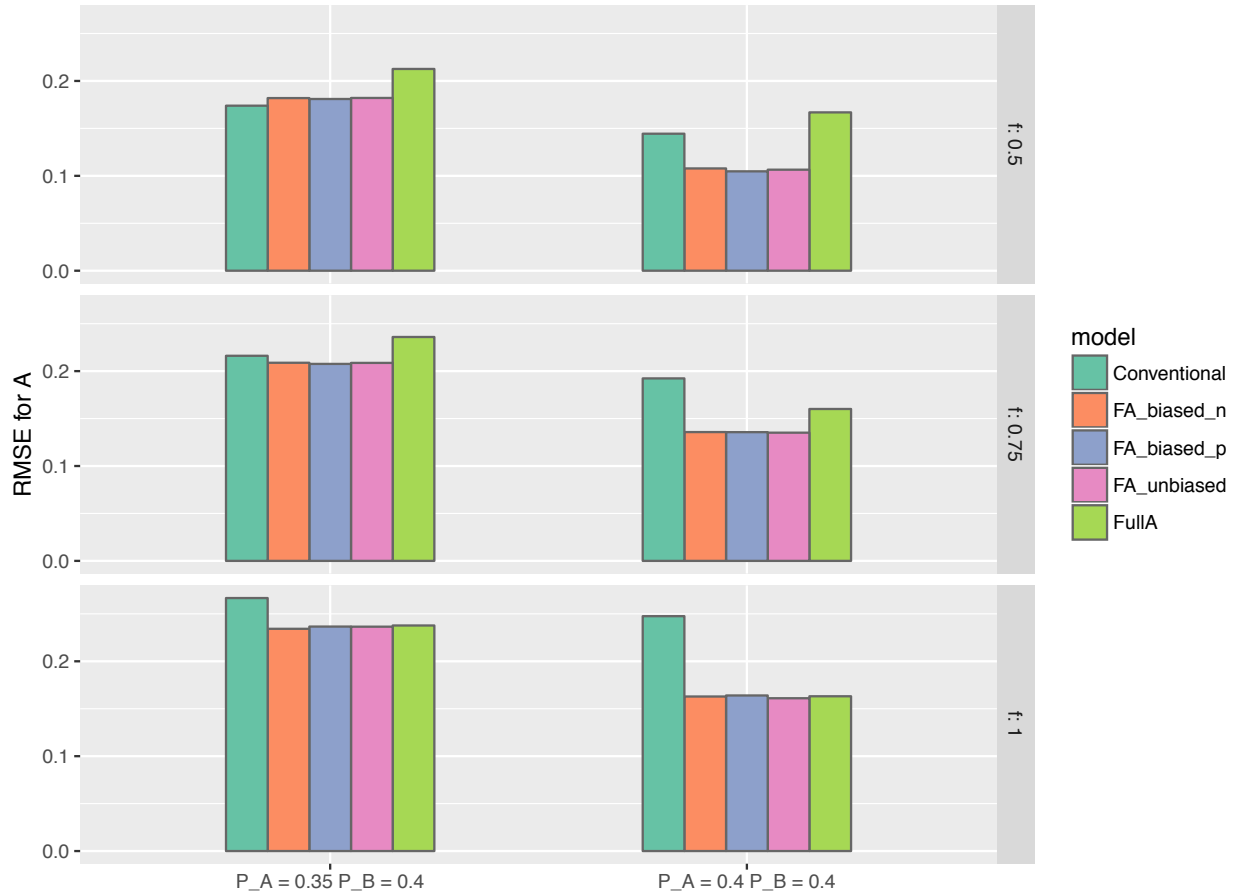

RMSE (root mean square error); FA (fractional additivity);  $P_A$  (probability of response with A);  $P_B$  (probability of response with B).

**Figure S.10:** Root mean square error for the effect size of B calculated for the six different simulation scenarios for the proposed model with a biased and unbiased prior, the conventional model (i.e., where  $\theta_{A\&B}$  is treated as completely independent of  $\theta_B$  and  $\theta_B$  and all priors are non-informative) and a model that assumes full additivity ( $f = 1$ ). The upper, middle and lower plots present the scenarios where the *true* fractional additivity parameter value ( $f$ ) is set to 0.5, 0.75, and 1, respectively. The left plots present the scenario where the failure probabilities of treatments A and B are set to  $P_A=0.35$  and  $P_B=0.40$ , whereas the plots to the right present the scenarios where  $P_A=0.40$  and  $P_B=0.40$ .

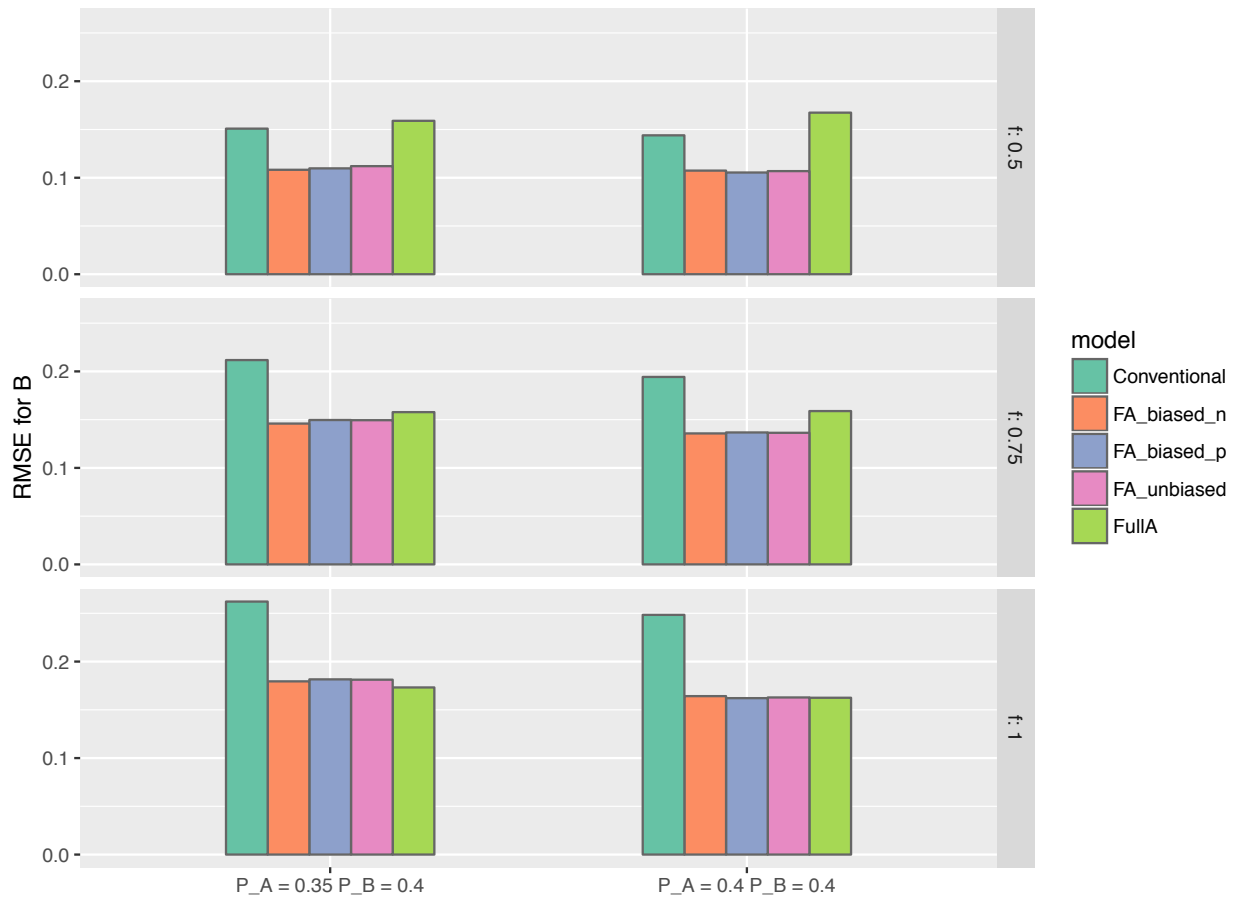

RMSE (root mean square error); FA (fractional additivity);  $P_A$  (probability of response with A);  $P_B$  (probability of response with B).

**Figure S.11:** Root mean square error for the effect size of A&B calculated 4 simulation scenarios representing no or weak fractional additivity with biased priors on  $f$  with prior means 0.5 and 0.75, the conventional model (i.e, where  $\theta_{A\&B}$  is treated as completely independent of  $\theta_A$  and  $\theta_B$  and all priors are non-informative) and a model with full additivity assumption ( $f = 1$ ). The upper, middle and lower plots present the scenarios where the *true* fractional additivity parameter value ( $f$ ) is set to 0, 0.25, and 1, respectively. The left plots present the scenario where the failure probabilities of treatments A and B are set to  $P_A=0.35$  and  $P_B=0.40$ , whereas the plots to the right present the scenarios where  $P_A=0.40$  and  $P_B=0.40$ .

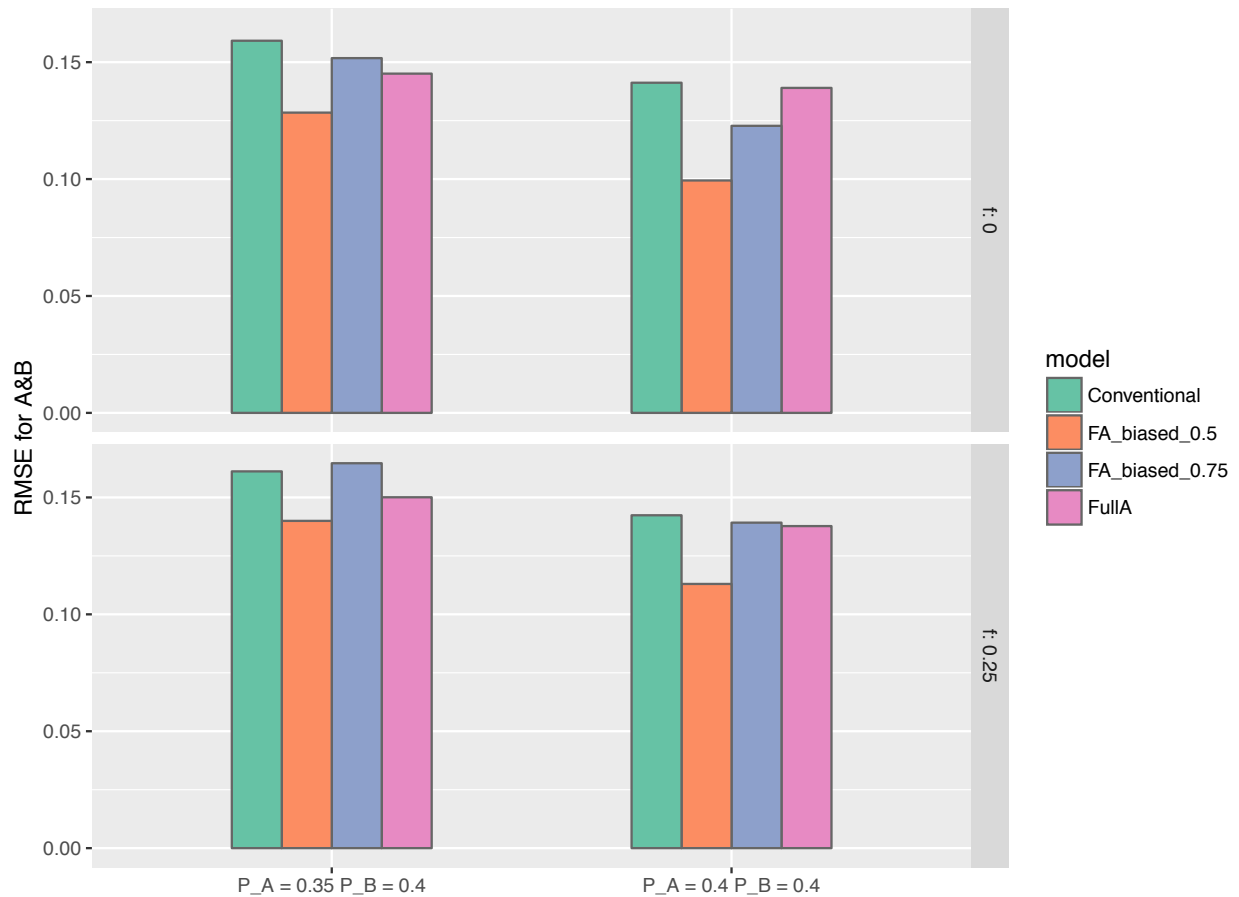

RMSE (root mean square error); FA (fractional additivity);  $P_A$  (probability of response with A);  $P_B$  (probability of response with B).

**Figure S.12:** Root mean square error for the effect size of A calculated 4 simulation scenarios representing no or weak fractional additivity with biased priors on  $f$  with prior means 0.5 and 0.75, the conventional model (i.e, where  $\theta_{A\&B}$  is treated as completely independent of  $\theta_A$  and  $\theta_B$  and all priors are non-informative) and a model with full additivity assumption ( $f = 1$ ). The upper, middle and lower plots present the scenarios where the *true* fractional additivity parameter value ( $f$ ) is set to 0, 0.25, and 1, respectively. The left plots present the scenario where the failure probabilities of treatments A and B are set to  $P_A=0.35$  and  $P_B=0.40$ , whereas the plots to the right present the scenarios where  $P_A=0.40$  and  $P_B=0.40$ .

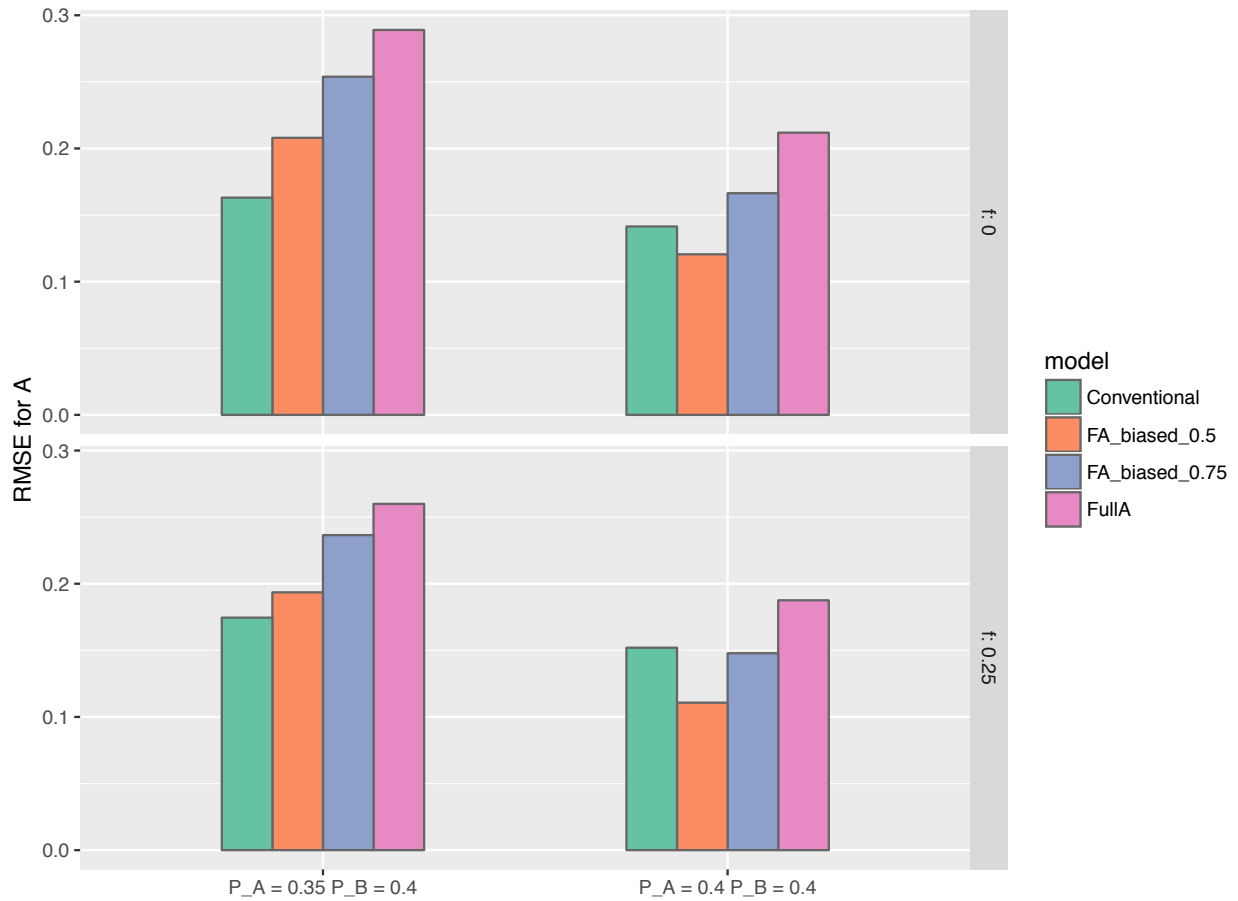

RMSE (root mean square error); FA (fractional additivity);  $P_A$  (probability of response with A);  $P_B$  (probability of response with B).

**Figure S.13:** Root mean square error for the effect size of B calculated 4 simulation scenarios representing no or weak fractional additivity with biased priors on  $f$  with prior means 0.5 and 0.75, the conventional model (i.e, where  $\theta_{A\&B}$  is treated as completely independent of  $\theta_A$  and  $\theta_B$  and all priors are non-informative) and a model with full additivity assumption ( $f = 1$ ). The upper, middle and lower plots present the scenarios where the *true* fractional additivity parameter value ( $f$ ) is set to 0, 0.25, and 1, respectively. The left plots present the scenario where the failure probabilities of treatments A and B are set to  $P_A=0.35$  and  $P_B=0.40$ , whereas the plots to the right present the scenarios where  $P_A=0.40$  and  $P_B=0.40$ .

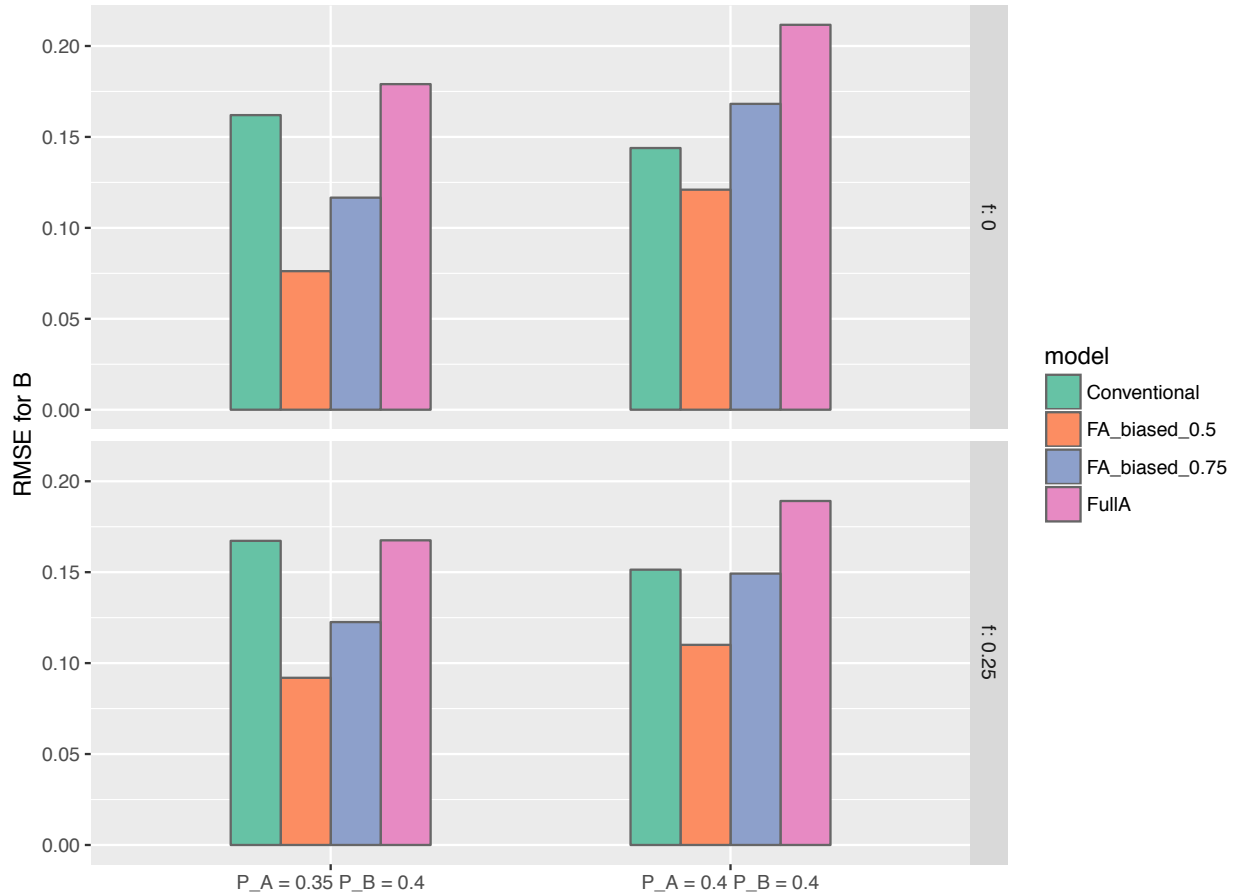

RMSE (root mean square error); FA (fractional additivity);  $P_A$  (probability of response with A);  $P_B$  (probability of response with B).

### S.14 Stan implementation of the fractional additivity model:

```
data{
  int N; // number of patients
  vector[N] treat_a; // binary vector: element n is 1 if patient n is treated by A
  vector[N] treat_b; // binary vector: element n is 1 if patient n is treated by B
  vector[N] treat_ab; // binary vector: element n is 1 if patient n is treated by A&B
  real theta_mean[2]; // mean effect sizes for A and B
  real<lower=0> theta_sd[2]; // sd of effect sizes for A and B
  real a0; // prior mean for f
  real b0; // prior sd for f
  int<lower=0,upper=1> y[N]; // vector of responses: 0 if negative, 1 if positive
}
parameters {
  real theta[2]; // effect sizes for A and B
  real f; // fractional additivity parameter
}
model {
  real mu_y; // latent continuous response
  real theta_ab; // effect size for A&B
  theta_ab = max(theta) + p * min(theta);
  f ~ normal(a0, b0); // prior on f
  for (j in 1:2) theta ~ normal(theta_mean[j], theta_sd[j]); // prior on effect sizes of A and B
  for (n in 1:N) {
    mu_y = treat_a[n] * theta[1] + treat_b[n] * theta[2]
      + treat_ab[n] * theta_ab;
    y[n] ~ bernoulli_logit(mu_y); // likelihood
  }
}
```
